# Supplementary material for: Dipyrrolyl quinoxalines with extended chromophores are efficient fluorimetric sensors for pyrophosphateElectronic supplementary information (ESI) available: experimental data. See http://www.rsc.org/suppdata/cc/b3/b301362f/
Source: Royal Society of Chemistry journal article supplement (doi:10.1039/b301362f), 2003-01-01
Supplement: b301362f.doc [file b301362f.doc]

**Supporting Information for:**

“Dypyrrolyl Quinoxalines with Extended Chromophores Are Efficient Fluorimetric Sensors for Pyrophosphate”

Dmitry Aldakov and Pavel Anzenbacher, Jr.

**Contents**

General

Synthesis and characterization of compounds

**General.** All synthetic transformations were performed under the atmosphere of dry argon using standard techniques. All reagents and materials from commercial sources were used as received. 4,7-Dibromo-2,1,3-benzothiadiazole was prepared according to published procedures.1 1,2-di(pyrrole-2-yl)ethane-1,2-dione was prepared according to the literature procedure.3a Phenyltributylstannane was purchased from Gelest Inc. and used as received. (4-Methoxyphenyl)tributylstannane2, (2,3-Dihydrothieno[3,4-b][1,4]dioxin-5-yl)tributylstannane3, and (4-N,N-dimethylaminophenyl)tributylstannane4 were prepared according to the standard procedure3.

1H and 13C NMR spectra were recorded on a Varian Unity 400 (400 MHz) spectrometer. The chemical shifts ( ppm) are referenced to the respective solvent and splitting patterns are designated as s (singlet), d (doublet), t (triplet), q (quartet), m (multiplet), and br (broad). EI-DIP mass spectra were measured using a Shimadzu QP5050A spectrometer.

**Physical Measurements.** Absorption spectra were recorded using a Hitachi U-3010 spectrophotometer, accurate to  0.3 nm. Steady-state and time-resolved fluorescence measurements were performed on a single photon counting spectrofluorimeter from Edinburgh Analytical Instruments (FL/FS 900). Optically dilute solutions (OD = 0.09-0.11) used for all photophysical experiments were prepared using spectroscopic grade solvents unless otherwise stated. For titration experiments the samples were excited at the isosbestic point of the lowest energy (ca 450 nm). Binding stoichiometry (1:1) was determined from Job plots constructed from titration experiments carried out at four different concentrations (both significantly higher and lower than concentrations used to determine the K*a*).

The binding constant calculations were performed as a single reciprocal plot transformation of the Stern-Volmer equation according to Connors.5 The fitting errors were <15%. The 1:1 stoichiometry was confirmed by Job plots in selected examples. Likewise, the 1:1 stoichiometry for the complexes of the DPQ-derivatives with anions is in agreement with previously published data.6

**Synthesis of compounds**

# 3,6-Dibromo-1,2-benzenediamine: 4,7-Dibromo-2,1,3-benzothiadiazole (1 g, 3.41 mmol) was suspended in 10 mL of mixture of acetic acid and water (7:3). The mixture was heated to 600 C and Zn metal powder (2 g, 5.11 mmol) was added. The stirred suspension was kept at 700 C for 3 h. After that the reaction mixture was cooled and poured into 50 mL of 1 M NaOH. The product was extracted into ether (4x100 mL). The organic phase was evaporated to give 903 mg (99% yield) of white mold-like product. M.p. 87-89 oC. 1H NMR (DMSO-*d*6, ): 5.00 (brs, 4H, NH2), 6.64 (s, 2H, arom). 13C APT NMR (DMSO-*d*6, ): 106.61 C, 120.68 CH, 133.16 C. Exact mass 263.89, EI/MS (70 eV): 266 (100) [M+].

**5,8-Dibromo-2,3-di(1*H*-2-pyrrolyl)quinoxaline (3):** 3,6-Dibromo-1,2-benzenediamine (326 mg, 1.0 mmol) and 1,2-di(1*H*-2-pyrrolyl)ethane-1,2-dione (188 mg, 1.0 mmol) were dissolved in glacial acetic acid (50 ml), and heated to reflux for 24 hours shielded from ambient light. TLC (25 % hexane in dichloromethane) showed the desired product as a yellow spot (R*f*=0.7). The volume of the reaction mixture was reduced to 10% in vacuum, dissolved in chloroform–methanol (9:1, 300 ml), washed with 1M NaOH, brine, and dried over anhydrous Na2SO4. The residue after evaporation was subjected to column chromatography on silica gel using hexane-dichloromethane mixture (25 - 75 %, v/v) as the eluent. The product was obtained as yellow powder (210 mg, 50% yield). m.p. 229-230 oC. 1H NMR (DMSO-*d*6, ): 6.19 (ddd, 2H, *J* = 2.5, 3.7, 4.7 Hz), 6.41 (ddd, 2H, *J* = 1.5, 2.5, 3.7 Hz), 7.09 (ddd, 2H, *J* = 1.5, 2.5, 4.1 Hz), 7.92 (s, 2H), 11.39 (brs, 2H). 13C APT NMR (DMSO-*d*6, ): 109.38 CH, 113.08 CH, 121.96 C, 122.98 CH, 127.75 C, 132.32 CH, 137.58 C, 145.79 C. EI/MS (70 eV): 418 (100) [M+], 336 (15), 256 (25). Anal. calcd. (%) for C16H10Br2N2 (418.09): C, 45.96; H, 2.41; N, 13.40. Found: C, 45.86; H, 2.41; N, 13.22.

# 5,8-Di(2,3-dihydro-thieno[3,4-b][1,4]dioxin-5-yl)-2,3-di(1*H*-2-pyrrolyl)quinoxaline (S3): 5,8-Dibromo-2,3-di(1*H*-2-pyrrolyl)quinoxaline (50 mg, 0.12 mmol) and 2,3-Dihydro-thieno[3,4-b][1,4]dioxin-5-yl)-tributyl-stannane (258 mg, 0.6 mmol) were dissolved in dry THF (100 ml), the solution was purged with argon for 15 min. and PdCl2(PPh3)2 (15 mg, 0.02 mmol) was added at room temperature under argon atmosphere. The mixture was stirred at 100 oC under argon atmosphere for 15 hours, cooled and concentrated on the rotavapor. The residue subjected to column chromatography (DCM-Hexane 3:1) to afford orange solid (31 mg, 48% yield): m.p. > 260 0C; 1H NMR (CDCl3, ) 4.28-4.41 (m, 8H, *ethylene*); 6.29 (ddd, 2H, *J*=2.6, 3.7, 5.4); 6.57 (s, 2H, *EDOT*), 7.09 (ddd, 2H, *J*=1.3, 2.5, 3.7); 7.26 (ddd, 2H, *J*=1.3, 2.6, 3.6); 8.41 (s, 2H, *H6*); 10.03 (brs, 2H, *NH*). 13C APT NMR (CDCl3, ): 65.74 CH2, 65.29 CH2, 102.20, 110.21, 113.48, 113.67, 122.10, 127.49, 127.86, 129.91, 135.90, 140.57, 141.14, 142.05. EI/MS (70 eV): m/z 540 (87) [M+], 269 (100), 267 (70). Anal. calcd. (%) for C28H20N4O4S2*0.5 H2O (549.1): C, 61.19; H, 3.85; N, 10.19; O, 13.10; S, 11.67. Found: C, 61.16; H, 3.71; N, 10.04.

**5,8-Diphenyl-2,3-di(1*H*-2-pyrrolyl)quinoxaline (S1):** m.p. > 260 oC; 1H NMR (CDCl3, ): 6.24 (ddd, 2H, *J*=2.3, 3.8, 5.1, *H3-pyr*); 6.93 (ddd, 2H, *J*=1.3, 2.6, 3.8, *H3-pyr*); 7.17 (ddd, 2H, *J*=1.3, 2.3, 3.6, *H5-pyr*); 7.46 (m, 2H); 7.54 (m, 4H); 7.71 (s, 2H, *H6*); 7.76 (m, 4H); 9.46 (brs, 2H, *NH*). 13C APT NMR (CDCl3, ): 109.89 CH, 112.84 CH, 121.37 CH, 127.41 CH, 127.96 CH, 128.70 CH, 129.35 C, 130.58 CH, 136.98 C, 138.50 C, 138.79 C, 141.32 C. EI/MS (70 eV): m/z 412 (100) [M+].

**5,8-Di[4-methoxyphenyl]-2,3-di(1*H*-2-pyrrolyl)quinoxaline (S2):** m.p. > 260 oC; 1H NMR (CDCl3, ): 3.94 (s, 6H, *OCH3*); 6.25 (ddd, 2H, *J*=2.6, 3.8, 5.4); 6.94 (ddd, 2H, *J*=1.4, 2.4, 3.8); 7.08 (m, 4H, *AA’XX’*); 7.16 (ddd, 2H, *J*=1.4, 2.6, 3.9); 7.66 (s, 2H, *H6*); 7.69 (m, 4H, *AA’XX’*); 9.47 (brs, 2H, *NH*). 13C APT NMR (CDCl3, ): 55.39 CH3, 109.88 CH, 112.72 CH, 113.43 CH, 121.29 CH, 128.34 CH, 129.49 C, 131.31 C, 131.67 CH, 137.06 C, 137.63 C, 141.12 C, 159.10 C. EI/MS (70 eV): m/z 412 (100) [M+]. Anal. calcd. (%) for C32H30N6*H2O (490.55) C, 73.45; H, 5.34; N, 11.42; O, 9.78. Found: C, 73.53; H, 5.35; N, 10.71.

**5,8-Di[4-(N,N-dimethylamino)-phenyl]-2,3-di(1*H*-2-pyrrolyl)quinoxaline (S4)**: m.p. > 260 oC. 1H NMR (CDCl3, ): 3.09 (s, 12H, *N(CH3)2*); 6.25 (ddd, 2H, *J*=2.5, 3.6, 5.1, *H3-pyr*); 6.91 (m, 4H, *AA’XX’*); 6.93 (ddd, 2H, *J*=1.4, 2.5, 3.6); 7.17 (ddd, 2H, *J*=1.4, 2.5, 3.8); 7.64 (s, 2H, *H6*); 7.69 (m, 4H, *AA’XX’*); 9.53 (brs, 2H, *NH*). 13C APT NMR (CDCl3, ): 40.63 CH3, 109.71 CH, 112.02 CH, 112.38 CH, 121.01 CH, 127.10 C, 128.07 CH, 129.67 CH, 131.35 CH, 137.15 C, 137.36 C, 140.70 C, 149.83 C. EI/MS (70 eV): m/z 498 (100) [M+], 241 (32). Anal. calcd. (%) for C32H30N6*H2O (516.64) C, 74.39; H, 6.24; N, 16.27; O, 3.10. Found: C, 74.66; H, 5.91; N, 16.15.

**References (Supporting Information).**

1. K. Pilgram, M. Zupan, R. Skiles, *J. Heterocycl. Chem.,* 1970, **7**, 629.
2. J. L. Wardell; S. Ahmed, *J. Organomet. Chem.,* 1974, **78***,* 395.
3. S.S. Zhu, T.M. Swager, *J. Am. Chem. Soc.* 1997**, 119***,* 12568.
4. *Organometallic Compounds, 2nd ed.*, ed. R.W. Weiss, Springer-Verlag, Berlin, 1967.
5. A.K. Connors, *Binding Constants: the Measurement of Molecular Complex Stability*; Wiley, New York, 1987.
6. *(a)* C.B. Black; B. Andrioletti; A. C. Try; C. Ruiperez; J.L. Sessler, *J. Am. Chem. Soc.,* 1999, **121**, 10438. *(b)* P. Anzenbacher Jr.; A.C. Try; H. Miyaji; K. Jursíková; V.M. Lynch; M. Marquez; J.L. Sessler, *J. Am. Chem. Soc*. 2000, **122**, 10268.
